# Supplementary material for: Automated 3D segmentation of methyl isocyanate-exposed rat trachea using an ultra-thin, fully fiber optic optical coherence endoscopic probe
Source: PubMed Central journal article supplement (PMC5992171; doi:10.1038/s41598-018-26389-2), 2018-06-07
Supplement: 41598_2018_26389_MOESM2_ESM.pdf [file 41598_2018_26389_MOESM2_ESM.pdf]

# Automated 3D segmentation of methyl isocyanate-exposed rat trachea using an ultra-thin, fully fiber optic optical coherence endoscopic probe

Yusi Miao<sup>1,2</sup>, Joseph C. Jing<sup>1,2</sup>, Vineet Desai<sup>1</sup>, Sari B. Mahon<sup>1</sup>, Matthew Brenner<sup>1</sup>, Livia A. Veress<sup>3</sup>, Carl W. White<sup>3</sup> & Zhongping Chen<sup>1,2\*</sup>

1 Beckman Laser Institute, University of California, Irvine, Irvine, California 92612

2 Department of Biomedical Engineering, University of California, Irvine, Irvine, California 92697

3 Department of Pediatrics, University of Colorado Denver, Denver, Colorado 80204

\*Corresponding author:

Zhongping Chen, PhD  
Professor  
Dept. of Biomedical Engineering  
University of California, Irvine  
Irvine, CA 92617  
e-mail: z2chen@uci.edu

## Supplementary Figures

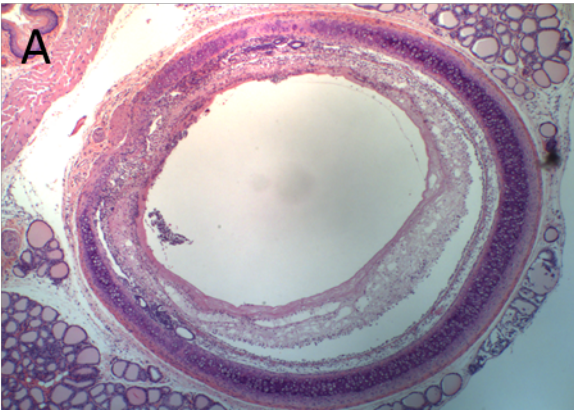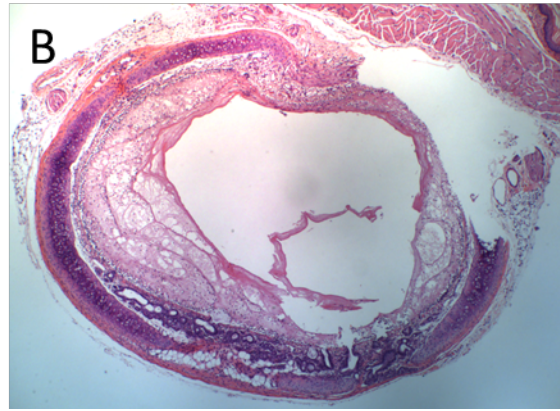

**Supplementary Figure S1.** Histological sectioning of rat trachea exposed to MIC gas shows the detachment of lumen from cartilage (**A**) and erosion of cartilage and stenosis (**B**).

## Comparison of Areas in Control/MIC Airways

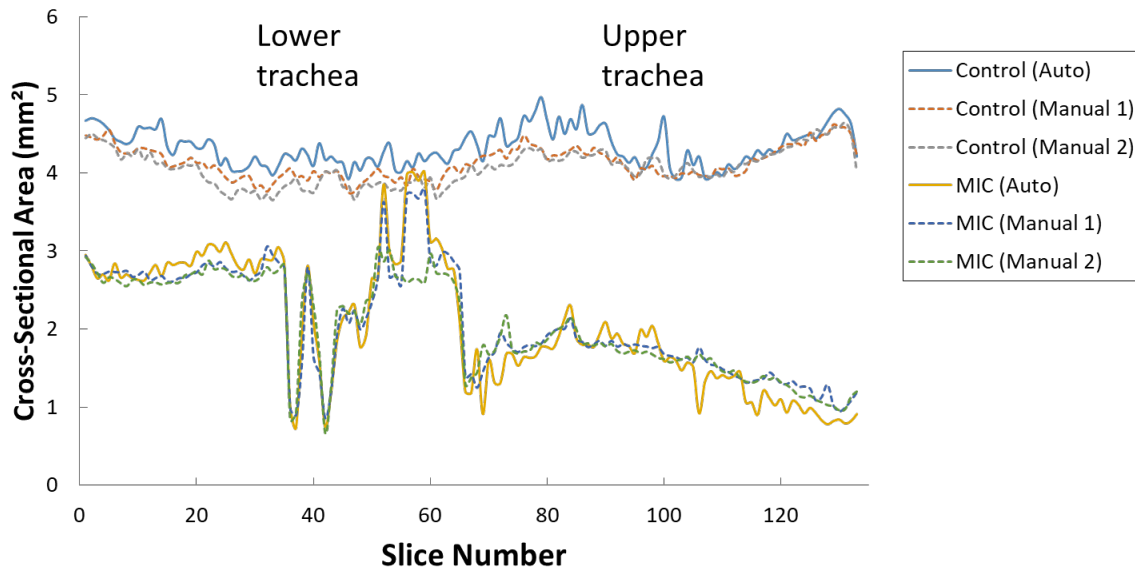

**Supplementary Figure S2.** The plot of cross-section area from carina (slice 0) to epiglottis opening (slice 130). While the control shows consistent cross-section area, the MIC-exposed trachea shows significant narrowing near epiglottis. The OCT slices are 0.2 mm apart.

## Supplementary Video Legend

Supplementary video: 3D surface models of rat trachea obtained from automated segmentation of OCT images.
